# Supplementary material for: Identification of novel serum autoantibodies against EID3 in non-functional pancreatic neuroendocrine tumors
Source: PubMed Central journal article supplement (PMC5739727; doi:10.18632/oncotarget.22175), 2017-10-31
Supplement: oncotarget-08-106206-s001.pdf [file oncotarget-08-106206-s001.pdf]

## Identification of novel serum autoantibodies against EID3 in non-functional pancreatic neuroendocrine tumors

### SUPPLEMENTARY MATERIALS

**Supplementary Table 1: List of antibodies used for immunohistochemical staining and Western blotting**

| <b>Immunohistochemical staining</b> |                   |          |             |
|-------------------------------------|-------------------|----------|-------------|
| Molecule                            | Clonality         | Dilution | Manufacture |
| EID3                                | Rabbit polyclonal | 1:1000   | Abcam       |
| <b>Western blotting</b>             |                   |          |             |
| Molecule                            | Clonality         | Dilution | Manufacture |
| PTEN                                | Mouse monoclonal  | 1:2000   | Origene     |
| EID3                                | Rabbit polyclonal | 1:1000   | Abcam       |
| EHD1                                | Rabbit monoclonal | 1:1000   | Abcam       |
| LGALS9                              | Rabbit polyclonal | 1:1000   | GeneTex     |
| BRAP                                | Rabbit polyclonal | 1:250    | Abnova      |
